# Supplementary material
Source: Springer Nature journal article supplement (https://www.springermedizin.de/resource/supplementary/12958_2004_145_MOESM1_ESM.pdf/9567240)

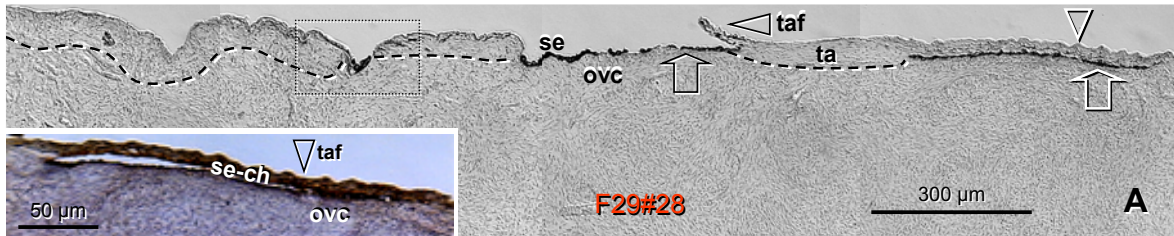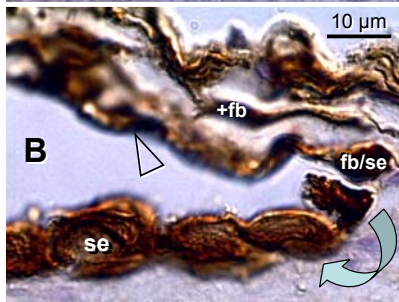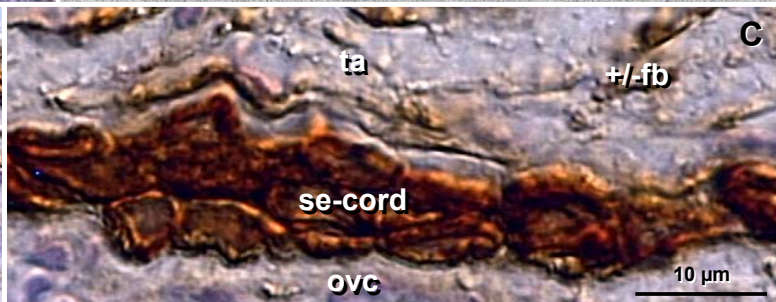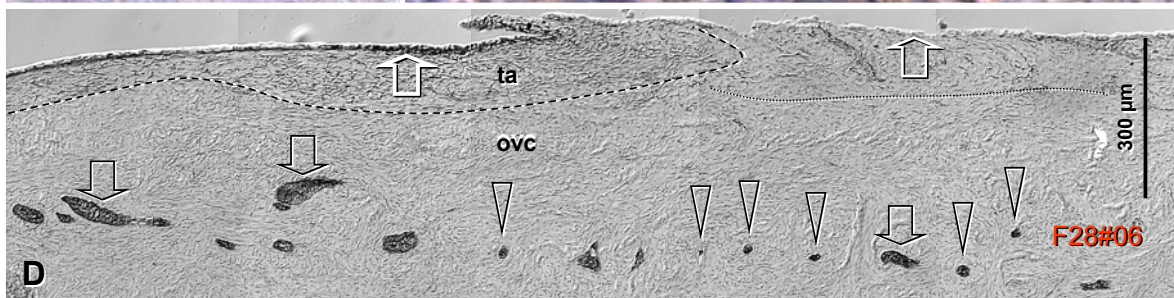

Supplement: MOESM1 [file 9567240]
